# Supplementary material
Source: PubMed Central journal article supplement (PMC2602881)
Supplement: NIHMS80735-supplement-supplement_1.pdf [file NIHMS80735-supplement-supplement_1.pdf]

## Supplemental Tables

| Genotype  | Cell Type    | Sample            | Mean<br>Contribution | Standard<br>Deviation | n  |
|-----------|--------------|-------------------|----------------------|-----------------------|----|
| Wild-type | Erythrocytes | Untreated (Day 0) | 35.2                 | 9.42                  | 11 |
|           |              | Day 2             | 8.92                 | 2.36                  | 8  |
|           |              | Day 5             | 13                   | 4.58                  | 8  |
|           |              | Day 12            | 29.6                 | 8.08                  | 8  |
|           |              | Day 20            | 30.7                 | 6.5                   | 4  |
|           | Precursors   | Untreated (Day 0) | 6.21                 | 2.22                  | 11 |
|           |              | Day 2             | 30                   | 4.84                  | 8  |
|           |              | Day 5             | 12.3                 | 3.05                  | 8  |
|           |              | Day 12            | 10                   | 2.29                  | 8  |
|           |              | Day 20            | 5.5                  | 3.56                  | 4  |

Supplemental Table 1. Recovery from stress anemia. Data is from Fig. 2B, representing percent of whole kidney marrow.

| Genotype    | Cell Type                                     | Sample    | Mean Contribution | Standard Deviation | n  |
|-------------|-----------------------------------------------|-----------|-------------------|--------------------|----|
| Wild-type   | Myelomonocytes <sup>1</sup>                   | untreated | 22.7              | 5.77               | 11 |
|             | Lymphocytes <sup>1</sup>                      |           | 14                | 3.1                | 11 |
|             | Precursors <sup>1</sup>                       |           | 6.21              | 2.22               | 11 |
|             | Erythrocytes <sup>1</sup>                     |           | 35.2              | 9.42               | 11 |
|             | Proerythroblasts <sup>2</sup>                 |           | 25.5              | 9.01               | 25 |
|             | Polychromatophilic Erythroblasts <sup>3</sup> |           | 11.4              | 6.2                | 25 |
| piggytail/+ | Myelomonocytes <sup>1</sup>                   |           | 26.5              | 8.06               | 5  |
|             | Lymphocytes <sup>1</sup>                      |           | 12.2              | 4.16               | 5  |
|             | Precursors <sup>1</sup>                       |           | 6.42              | 2.42               | 5  |
|             | Erythrocytes <sup>1</sup>                     |           | 28.8              | 12.6               | 18 |
|             | Proerythroblasts <sup>2</sup>                 |           | 19.3              | 11.6               | 12 |
|             | Polychromatophilic Erythroblasts <sup>3</sup> |           | 6.53              | 4.06               | 12 |
| somitabun/+ | Myelomonocytes <sup>1</sup>                   |           | 38.2              | 7.79               | 7  |
|             | Lymphocytes <sup>1</sup>                      |           | 19.4              | 2.96               | 7  |
|             | Precursors <sup>1</sup>                       |           | 10                | 3.95               | 7  |
|             | Erythrocytes <sup>1</sup>                     |           | 16.4              | 1.67               | 5  |
|             | Proerythroblasts <sup>2</sup>                 |           | 7.01              | 2.2                | 3  |
|             | Polychromatophilic Erythroblasts <sup>3</sup> |           | 1.72              | 0.165              | 3  |
| m169/m169   | Myelomonocytes <sup>1</sup>                   |           | 33.6              | 12                 | 2  |
|             | Lymphocytes <sup>1</sup>                      |           | 20.2              | 1.48               | 2  |
|             | Precursors <sup>1</sup>                       |           | 10.9              | 3.58               | 2  |
|             | Erythrocytes <sup>1</sup>                     |           | 20.2              | 1.48               | 2  |
| tc227/tc227 | Myelomonocytes <sup>1</sup>                   |           | 19.6              | 7.21               | 5  |
|             | Lymphocytes <sup>1</sup>                      |           | 30.2              | 3.01               | 5  |
|             | Precursors <sup>1</sup>                       |           | 14.3              | 5.31               | 5  |
|             | Erythrocytes <sup>1</sup>                     |           | 24.8              | 5.65               | 5  |

Supplemental Table 2. Steady-state hematopoiesis. Data is from Fig. 3 and Fig. 4.

1- percent whole kidney marrow

2- percent of GFP+(low) "precursors"

3- percent of GFP+(low) "lymphocytes"

| Genotype    | Cell Type                                     | Sample            | Mean Contribution | Standard Deviation | n  |
|-------------|-----------------------------------------------|-------------------|-------------------|--------------------|----|
| Wild-type   | Proerythrocytes <sup>1</sup>                  | Untreated (Day 0) |                   |                    |    |
|             |                                               | Day 2             | 49.9              | 10.2               | 8  |
|             |                                               | Day 5             | 45.7              | 10.6               | 9  |
|             |                                               | Day 12            | 22.9              | 7.24               | 9  |
|             | Polychromatophilic Erythroblasts <sup>2</sup> | Untreated (Day 0) | 11                | 5.76               | 8  |
|             |                                               | Day 2             | 13.9              | 7.38               | 8  |
|             |                                               | Day 5             | 28                | 11.1               | 9  |
|             |                                               | Day12             | 11.1              | 6.33               | 9  |
|             | Erythrocytes <sup>3</sup>                     | Untreated (Day 0) | 35.2              | 9.25               | 8  |
|             |                                               | Day 2             | 8.93              | 2.36               | 8  |
|             |                                               | Day 5             | 12.7              | 4.58               | 9  |
|             |                                               | Day 12            | 21.6              | 7.21               | 9  |
| piggytail/+ | Proerythrocytes <sup>1</sup>                  | Untreated (Day 0) | 19.3              | 11.6               | 12 |
|             |                                               | Day 2             | 47.3              | 8.06               | 6  |
|             |                                               | Day 5             | 37.9              | 13.4               | 6  |
|             |                                               | Day 12            | 23                | 6.68               | 6  |
|             | Polychromatophilic Erythroblasts <sup>2</sup> | Untreated (Day 0) | 6.53              | 4.06               | 12 |
|             |                                               | Day 2             | 30                | 7.04               | 6  |
|             |                                               | Day 5             | 35.9              | 11.1               | 6  |
|             |                                               | Day 12            | 11.1              | 3.51               | 6  |
|             | Erythrocytes <sup>3</sup>                     | Untreated (Day 0) | 33.7              | 8.67               | 6  |
|             |                                               | Day 2             | 8.99              | 4.93               | 6  |
|             |                                               | Day 5             | 11                | 3.01               | 6  |
|             |                                               | Day 12            | 20.2              | 8.75               | 6  |
| somitabun/+ | Proerythrocytes <sup>1</sup>                  | Untreated (Day 0) | 7.01              | 2.2                | 3  |
|             |                                               | Day 2             | 45.8              | 6.26               | 3  |
|             |                                               | Day 5             | 51.3              | 13.1               | 3  |
|             |                                               | Day 12            | 21.8              | 1.45               | 3  |
|             | Polychromatophilic Erythroblasts <sup>2</sup> | Untreated (Day 0) | 1.72              | 0.165              | 3  |
|             |                                               | Day 2             | 28                | 6.85               | 3  |
|             |                                               | Day 5             | 33.3              | 7.59               | 3  |
|             |                                               | Day 12            | 2.7               | 0.618              | 3  |
|             | Erythrocytes <sup>3</sup>                     | Untreated (Day 0) | 16.4              | 1.67               | 5  |
|             |                                               | Day 2             | 9.92              | 3.13               | 3  |
|             |                                               | Day 5             | 11.6              | 0.839              | 3  |
|             |                                               | Day12             | 22.6              | 8.47               | 3  |

Supplemental Table 3. Recovery from stress anemia. Data is from Fig. 5.

1- percent of GFP+(low) "precursors"

2- percent of GFP+(low) "lymphocytes"

3- percent whole kidney marrow

| Genotype | Cell Type                                     | Sample            | Mean Contribution | Standard Deviation | n |
|----------|-----------------------------------------------|-------------------|-------------------|--------------------|---|
| ΔBR      | Proerythrocytes <sup>1</sup>                  | Untreated (Day 0) | 24.2              | 7.28               | 8 |
|          |                                               | Day 2             | 57.4              | 7.15               | 3 |
|          |                                               | Day 4             | 51                | 5.65               | 5 |
|          |                                               | Day 12            | 32.2              | 1.78               | 5 |
|          |                                               | Day 19            | 17                | 1.68               | 3 |
|          | Polychromatophilic Erythroblasts <sup>2</sup> | Untreated (Day 0) | 19.7              | 7.06               | 8 |
|          |                                               | Day 2             | 37.6              | 0.755              | 3 |
|          |                                               | Day 4             | 52.5              | 4.98               | 5 |
|          |                                               | Day 12            | 29.8              | 9.14               | 5 |
|          |                                               | Day 19            | 13.4              | 4.33               | 3 |
|          | Erythrocytes <sup>3</sup>                     | Untreated (Day 0) | 43.4              | 9.52               | 8 |
|          |                                               | Day 2             | 11.6              | 2.28               | 3 |
|          |                                               | Day 4             | 15.5              | 3.16               | 5 |
|          |                                               | Day 12            | 35.1              | 2.48               | 5 |
|          |                                               | Day 19            | 34.9              | 2.85               | 3 |

Supplemental Table 4. Recovery from stress anemia. Data is from Fig. 7.

- 1- percent of GFP+(low) "precursors"
- 2- percent of GFP+(low) "lymphocytes"
- 3- percent whole kidney marrow
